# Supplementary material
Source: PubMed Central journal article supplement (PMC3967029)
Supplement: supp_tpc.113.121087_tpc121087Supplemental.pdf [file supp_tpc.113.121087_tpc121087Supplemental.pdf]

## Supplemetanl Figure 1

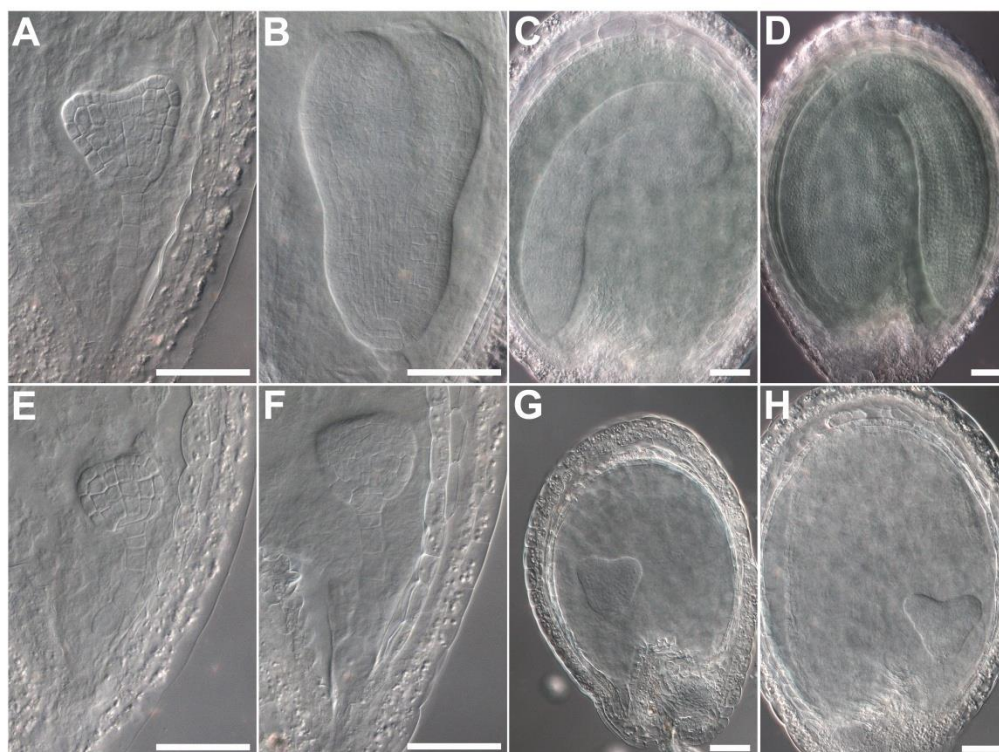

**Supplemental Figure 1.** Mutant Embryos Were Arrested before the Heart Stage.

(A) to (D) Whole-mount, cleared embryos from wild-type siliques.

(E) to (H) Cleared *dau* mutant embryos from *dau* heterozygous plants.

(A) and (E) are in the same silique representing wild-type embryo at the heart stage and *dau* embryo at the globular stage.

(B) and (F) show wild-type embryo at the torpedo stage and *dau* embryo at the transition stage in the same silique.

(C) and (G) are in the same silique representing wild-type embryo at the early-cotyledon stage and *dau* embryo at the heart stage.

(D) and (H) show wild-type embryo at the cotyledon stage and *dau* embryo at the late heart stage in the same silique. Bars=100 μm.

## Supplemental Figure 2

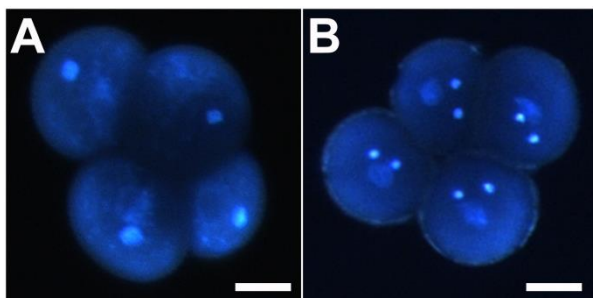

**Supplemental Figure 2.** DAPI Staining of *dau/DAU qrt/qrt* Quartet Pollen.

(A) Bicellular grains at the stage of pollen mitosis I.

(B) Tricellular grains at the stage of pollen mitosis II. Bars=50  $\mu$ m.

### Supplemental Figure 3

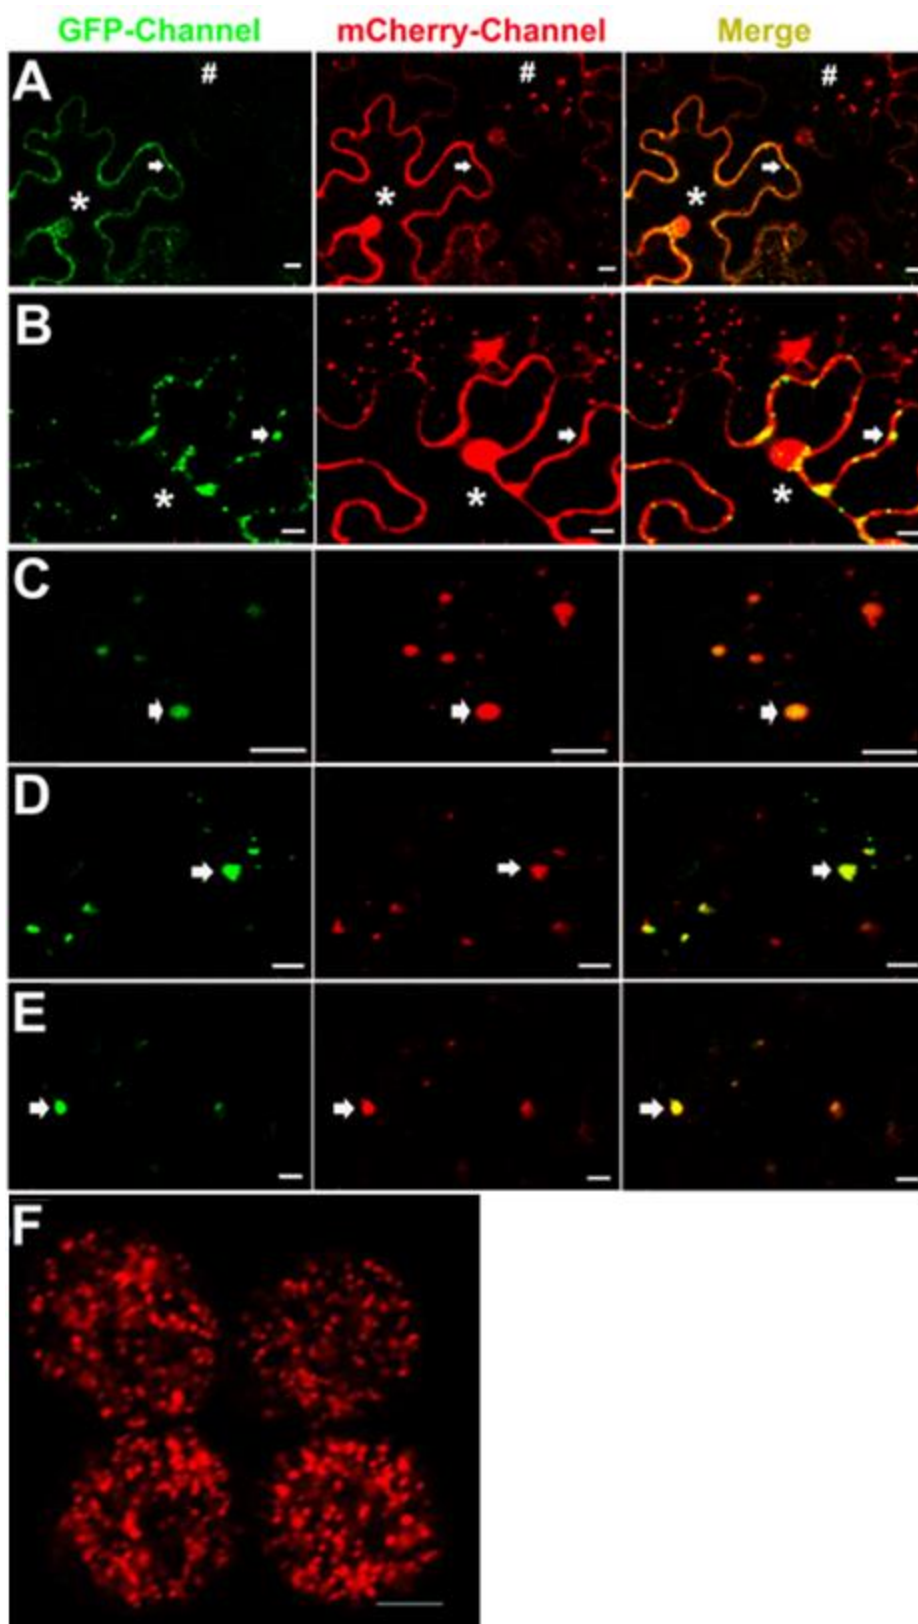

**Supplemental Figure 3.** Peroxisomal Localization of DAU-EGFP.

Constructs in pairs as indicated were co-transformed into *N. benthamiana* leaf cells and viewed with confocal microscopy after three days.

**(A)** Coexpression of DAU-EGFP and mCherry-PTS1. Note peroxisomal localization (#) and cytosolic localization (\*) of mCherry-PTS1. DAU-EGFP was occasionally colocalized with mCherry-PTS1 (arrow).

**(B)** Coexpression of DAU-EGFP and PTS2-mCherry. Note cytosolic localization of PTS2-mCherry (\*) and occasional colocalization of DAU-EGFP and mCherry-PTS1 (arrow).

**(C)** Colocalization of DAU-EGFP and PEX12-mCherry (arrow).

**(D)** Colocalization of DAU-EGFP and mCherry-PEX13 (arrow).

**(E)** Colocalization of DAU-EGFP and mCherry-PEX16 (arrow).

**(F)** Peroxisomal localization of mCherry-PTS1 in genomic *DAU*-complemented *dau/DAU qrt/qrt*.

Bars = 10  $\mu$ m.

## Supplemental Figure 4

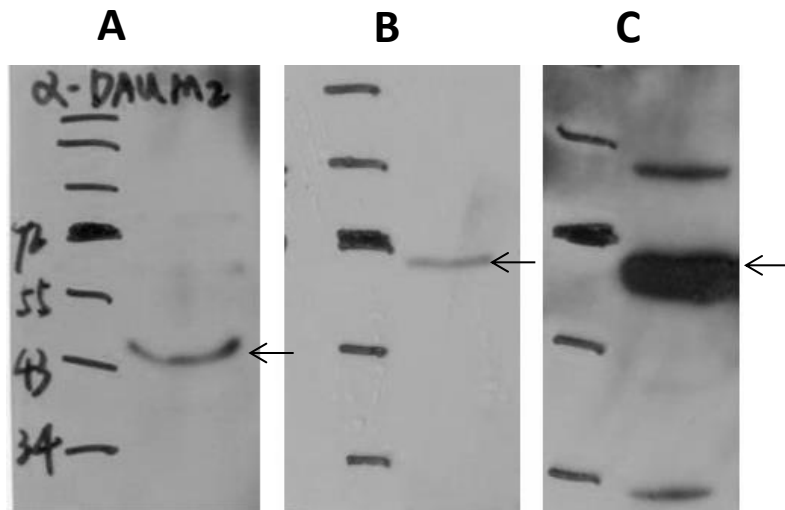

**Supplemental Figure 4.** The Specificity Determination of DAU Antibody by Immunoblot.

(A). A specific band of 43 kD was detected by DAU antibody in samples from wild-type seedlings.

(B). One specific band of 70 kD was detected by GFP antibody in samples from tobacco transformed with DAU-GFP .

(C).The 70-kD band corresponding to the right band at (B) was detected by DAU antibody from the same sample as in (B).

The numbers drawn on the left of (A) indicate the molecular weight marker and the unit is kDa.

## Supplemental Figure 5

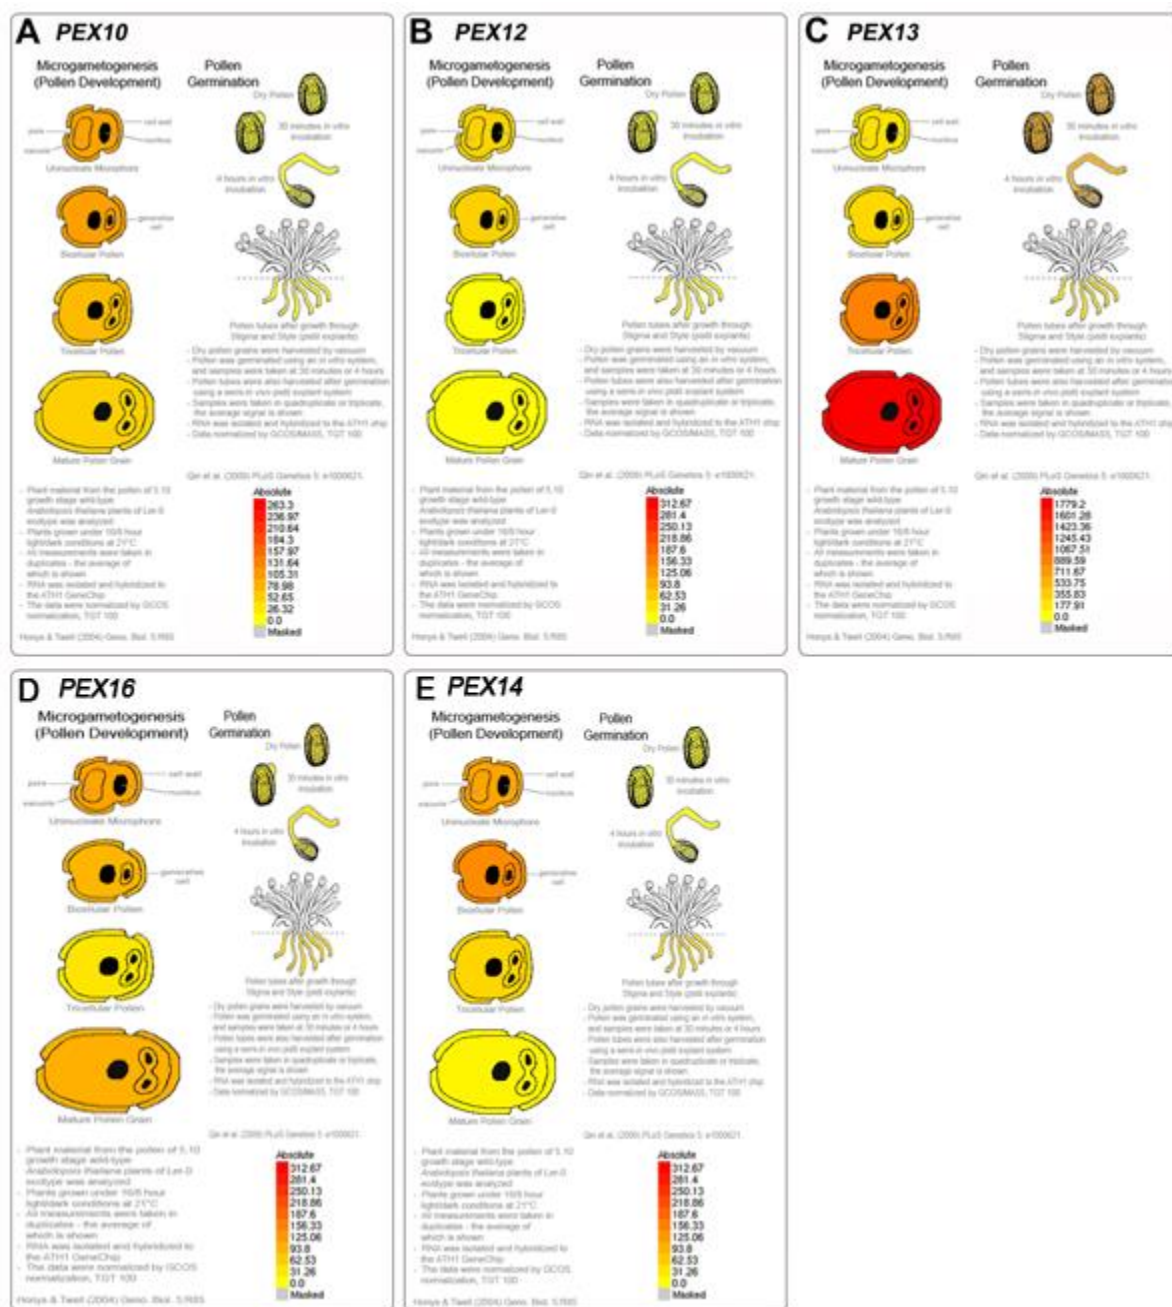

**Supplemental Figure 5.** Expression Levels of *PEX10*, *PEX12*, *PEX13*, *PEX16* and *PEX14* in Pollen Development and Germination. The data were obtained by tools of *Arabidopsis* eFP Browsers in the website of The Bio-Array Resource for Plant Biology (<http://bar.utoronto.ca/welcome.htm>). The expression level of *PEX13* is much higher than that of other genes during pollen development and germination.

**Supplemental Table 1**Complementation analysis of *ProDAU:DAU-EGFP* transgenic plants.

| <i>ProDAU:DAU-EGFP</i><br>transgenic line | T2 generation          |                        | <i>Kan<sup>R</sup></i><br>/ <i>Kan<sup>S</sup></i><br>ratio | Chi-square<br>test                      |
|-------------------------------------------|------------------------|------------------------|-------------------------------------------------------------|-----------------------------------------|
|                                           | <i>Kan<sup>R</sup></i> | <i>Kan<sup>S</sup></i> |                                                             |                                         |
| 1                                         | 331                    | 147                    | 2.25                                                        | $\chi^2 = 20.11, P < 0.01, n = 1$       |
| 2                                         | 280                    | 134                    | 2.09                                                        | $\chi^2 = 14.05, P < 0.01, n = 1$       |
| 3                                         | 373                    | 187                    | 1.99                                                        | $\chi^2 = 13.92, P < 0.01, n = 1$       |
| 4                                         | 337                    | 122                    | 2.76                                                        | $\chi^2 = 34.73, P < 0.01, n = 1$       |
| 5                                         | 327                    | 193                    | 1.69                                                        | $\chi^2 = 5.46, 0.01 < P < 0.05, n = 1$ |
| 7                                         | 273                    | 135                    | 2.02                                                        | $\chi^2 = 12.20, P < 0.01, n = 1$       |
| 8                                         | 326                    | 103                    | 2.51                                                        | $\chi^2 = 44.40, P < 0.01, n = 1$       |
| <i>dau/DAU</i>                            | 370                    | 289                    | 1.28                                                        | n.d.                                    |

n.d. not determined.

**Supplemental Table 2***In vitro* germination ratio of *apem9-2* and *apem9-3*.

|                | Pollen grains | Pollen tubes | Germination ratio (%) | Chi-square test                  |
|----------------|---------------|--------------|-----------------------|----------------------------------|
| Col-0          | 1866          | 1561         | 83.65%                | n.d.                             |
| <i>apem9-2</i> | 1532          | 1256         | 81.99%                | $\chi^2=1.65$ , $P>0.05$ , $n=1$ |
| <i>apem9-3</i> | 1986          | 1685         | 84.84%                | $\chi^2=1.03$ , $P>0.05$ , $n=1$ |

n.d., not detected.



**Supplemental Table 3**

Sequences of primers used in this work.

|              |                                     |                                       |
|--------------|-------------------------------------|---------------------------------------|
| DAU genomic  | DAUg-F                              | 5'-GGATCTAGATGGTTAAGCCAAGGGTCTAA-3'   |
|              | DAUg-R                              | 5'-GGAGGTACCCCATATTA AAAAGGCAAGGAG-3' |
| DAUpro-GUS   | DAUpro-F                            | 5'-GGAGTCGACTGGTTAAGCCAAGGGTCTAA-3'   |
|              | DAUpro-R                            | 5'-GGAGGATCCCAAATATCAGTTGCCTCCAT-3'   |
|              | DAU3T-F                             | 5'-GGAGAGCTCAGATGGATCAAATTTGGCA-3'    |
|              | DAU3T-R                             | 5'-GGAGAGCTCCCATATTA AAAAGGCAAGGAG-3' |
| Localization | NOS-F                               | 5'-CGAGCTCGATCGTTCAAACATTTGGC-3'      |
|              | NOS-R                               | 5'-CGGAATTCATCGAATTCGATCTAGTAA-3'     |
|              | 35S-F                               | 5'-CCCAAGCTTCGACACTCTCGTCTACTCCA-3'   |
|              | 35S-R                               | 5'-AACTGCAGAGAGATAGATTTGTAGAGAGAGA-3' |
|              | N-EGFP-F                            | 5'-CCGCTCGAGATGGTGAGCAAGGGCGAG-3'     |
|              | N-EGFP-R                            | 5'-ACGCGTCGACCTTGTACAGCTCGTCCATG-3'   |
|              | C-EGFP-F                            | 5'-CGCGGATCCGTGAGCAAGGGCGAGGAG-3'     |
|              | C-EGFP-R                            | 5'-CGAGCTCTTACTTGTACAGCTCGTC-3'       |
|              | N-DAU-Xba-F                         | 5'-TGCTCTAGAATGGAGGCAACTGATATTTG-3'   |
|              | N-DAU-R                             | 5'-CGGGGTACCTCATGTTGTGGTGCTTGGTA-3'   |
|              | N-DAU-Sal-F                         | 5'-ACGCGTCGACATGGAGGCAACTGATATTT-3'   |
|              | DAU-115-R                           | 5'-CGCGGATCCTCAATCACGTACACCCAAATAG-3' |
|              | C-DAU-F                             | 5'-AACTGCAGATGGAGGCAACTGATATTTG-3'    |
|              | C-DAU-Xba-R                         | 5'-TGCTCTAGATGTTGTGGTGCTTGGTATGG-3'   |
|              | DAU-267-F                           | 5'-AACTGCAGATGTCCAGGGGAAAGGTTG-3'     |
|              | C-DAU-BamH-R                        | 5'-CGCGGATCCTGTTGTGGTGCTTGGTATG-3'    |
|              | N-mCherry-F                         | 5'-CCGCTCGAGATGGTGAGCAAGGGCGAGGA-3'   |
|              | N-mCherry-R                         | 5'-ACGCGTCGACCTTGTACAGCTCGTCCATG-3'   |
|              | C-mCherry-F                         | 5'-GGGGTGAGCAAGGGCGAGGAGGA-3'         |
|              | C-mCherry-R                         | 5'-T TACTTGTACAGCTCGTCCATG-3'         |
| PEX7-F       | 5'-TGCTCTAGAATGCCGGTGTTCAAAGCTCC-3' |                                       |

|                                                |                |                                       |
|------------------------------------------------|----------------|---------------------------------------|
|                                                | PEX7-R         | 5'-CGGGGTACCTCAACTGGCTCTAGGATCCA-3'   |
|                                                | PEX13-F        | 5'-ACGCGTCGACATGGCGTCTCAGCCTGCAGG-3'  |
|                                                | PEX13-R        | 5'-TGCTCTAGATTAGTTGCCCCATACATTGT-3'   |
|                                                | PEX16-F        | 5'-TGCTCTAGAATGGAAGCTTATAAGCAATGGG-3' |
|                                                | PEX16-R        | 5'-CGGGGTACCTCACGATCCCGATATGTAAG-3'   |
|                                                | PTS2-F         | 5'-GCGTCGACAAAAAATGGAGAAAGCGATCGAG-3' |
|                                                | PTS2-R         | 5'-GGGATAGAGAGAGGTCCTCTGATA-3'        |
|                                                | PEX12-F        | 5'-ACGCGTCGACATGTTGTTTCAGGTGGGAGG-3'  |
|                                                | PEX12-R        | 5'-GGGGTGTCTGAAACAACCTCC-3'           |
|                                                | PEX14-F        | 5'-ACGCGTCGACATGGCAACTCATCAGCAAAC-3'  |
|                                                | PEX14-R        | 5'-GGGGTCCCTTCCTGGCTGATA-3'           |
|                                                | Lat52pro-F     | 5'-CCCAAGCTTTCGACATACTCGACTCAG-3'     |
|                                                | Lat52pro-R     | 5'-AACTGCAGTTAAATTGGAATTTTTTTTTT-3'   |
|                                                | PTS1-R         | 5'-TGCTCTAGATTACAGCTTCGATCTCTTGT-3'   |
| luciferase<br>complementation<br>imaging assay | DAU-Luc-F      | 5'-CGGGGTACCATGGAGGCAACTGATATT-3'     |
|                                                | DAU-NLuc-R     | 5'-ACGCGTCGACTGTTGTGGTGCTTGGTATG-3'   |
|                                                | DAU-CLuc-R     | 5'-ACGCGTCGACTCATGTTGTGGTGCTTGGT-3'   |
|                                                | PEX13-Luc-F    | 5'-CGGGGTACCATGGCGTCTCAGCCTGCAG-3'    |
|                                                | PEX13-NLuc-R   | 5'-ACGCGTCGACGTTGCCCCATACATTG-3'      |
|                                                | PEX13-CLuc-R   | 5'-ACGCGTCGACTTAGTTGCCCCATACATTG-3'   |
|                                                | PEX16-Luc-F    | 5'-CGGGGTACCATGGAAGCTTATAAGCAAT-3'    |
|                                                | PEX16-NLuc-R   | 5'-ACGCGTCGACCGATCCCGATATGTAA-3'      |
|                                                | PEX16-CLuc-R   | 5'-ACGCGTCGACTCACGATCCCGATATGTAA-3'   |
| DAU antibody                                   | DAU-BamH-F     | CGCGGATCCATGGAGGCAACTGATATTTG         |
|                                                | DAU-268-Sal-R  | ACGCGTCGACGGACATGCTAAATTGGGTAT        |
| Confirmation of<br>T-DNA insertion<br>sites    | LBa1           | 5'-TGGTTCACGTAGTGGGCCATCG-3'          |
|                                                | SALK_022380-RP | 5'-TGACCAAAGTGACCAAAGGTTTC-3'         |
|                                                | SALK_132193-RP | 5'-CATGTTGTGGTGCTTGGTATG-3'           |
|                                                | SALK_007838-RP | 5'-TCGGTACAATTTTTCCGACAC-3'           |

|  |                |                             |
|--|----------------|-----------------------------|
|  | SALK_013612-RP | 5'-TGCGATGAAAAATCTACCGAG-3' |
|  | SALK_055083-RP | 5'-TTTACTGCTGCTGTAGGTGGC-3' |
|  | SALK_007441-RP | 5'-GAGCTGCTATGGCAACTCATC-3' |
|  | CS6000-RP      | 5'-ATGGAAGCTTATAAGCAATG-3'  |

The underlines indicate the enzyme digest sites.
